# Supplementary material for: Silver ions promote blebs growth in U251 glioblastoma cell by activating nonselective cationic currents
Source: PubMed Central journal article supplement (PMC6733836; doi:10.1038/s41598-019-49198-7), 2019-09-09
Supplement: 41598_2019_49198_MOESM1_ESM.pdf [file 41598_2019_49198_MOESM1_ESM.pdf]

## Silver ions promote blebs growth in U251 glioblastoma cell by activating nonselective cationic current.

Francesco Ragonese, Lorenzo Monarca, Federica Bastioli, Cataldo Arcuri, Loretta Mancinelli and Bernard Fioretti

### SUPPLEMENTARY FIGURES

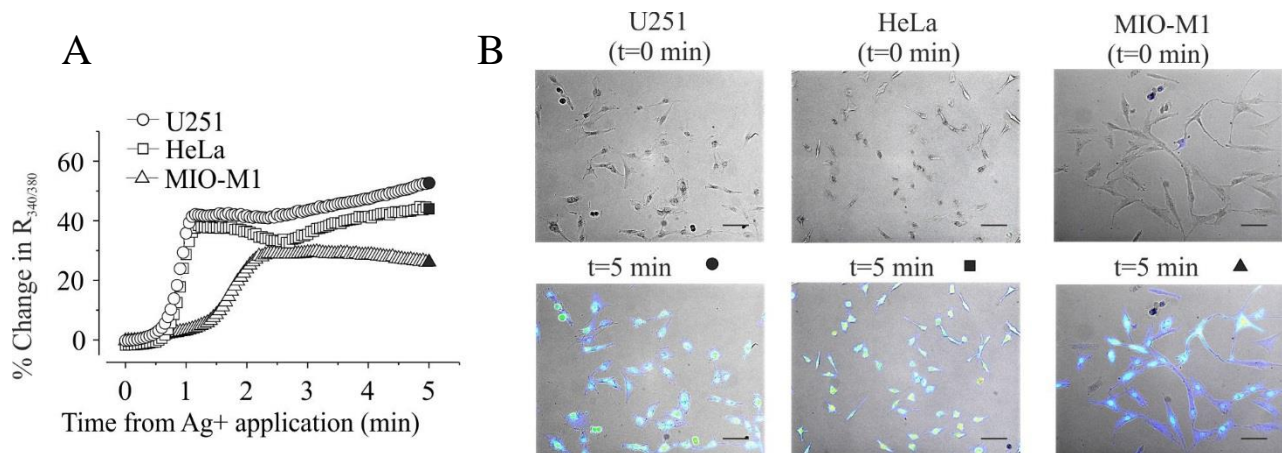

**Supplementary Fig. S1. Silver ions increase intracellular  $Ca^{2+}$  levels in different human cell lines.** **A)** Intracellular calcium levels evaluated by fluorescent imaging with FURA-2 from 20 cells during application of  $3 \mu M$  of silver ions in cervical carcinoma HeLa (squares) [1] and immortalized human Müller cell line MIO-M1 (triangles) [2] compared with U251 glioblastoma cell lines (circles). **B)** Merge of brightfield and pseudo-colour of ratio 340/380 emission images of above mentioned cell lines before (0 min) and after 5 minutes application of  $3 \mu M$  of  $Ag^+$ . Intracellular calcium levels is indicated on a rainbow scale with blue represent low  $[Ca^{2+}]_i$  and orange/red high  $[Ca^{2+}]_i$ . Scaling bars:  $100 \mu m$ .

1. Gey G. O., Coffman W. D., Kubicek M. T., 1952. Tissue culture studies of the proliferative capacity of cervical carcinoma and normal epithelium. *Cancer Res.* 12: 264–265
2. Limb G. A., Salt T. E., Munro P. M., Moss S. E., Khaw P.T. In vitro characterization of aspointaneously immortalized human Müller cell line (MIO-M1). *Invest Ophthalmol Vis Sci.* **43(3)**, 864-9, (2002).

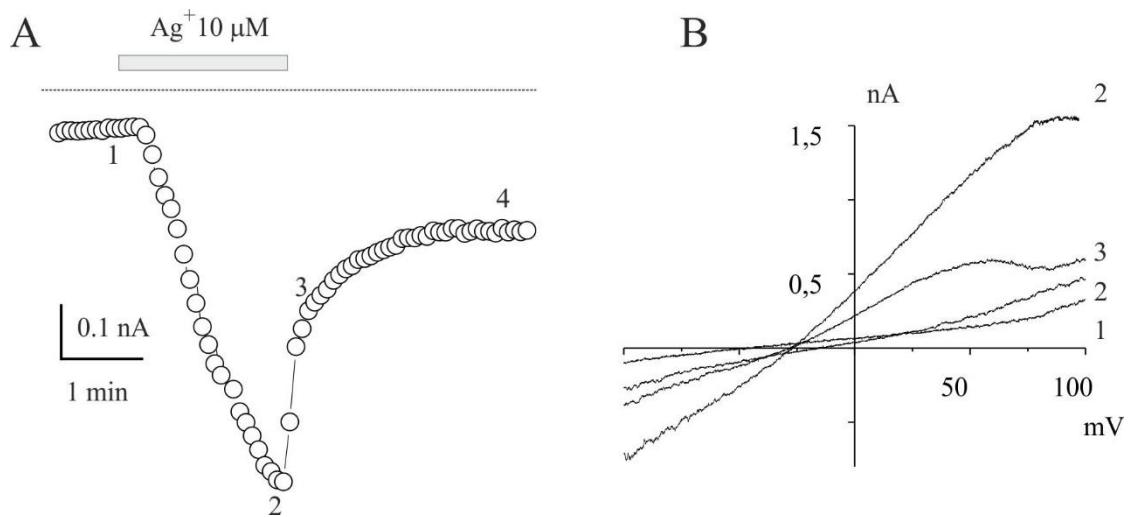

**Supplementary Fig. S2. I<sub>Ag</sub> was partially reverted after wash out.** **A)** Time course of inward current at -90 mV before (1), after application 10 μM Ag<sup>+</sup> (2) and during wash-out (3 and 4). The dates points represent the currents recorded at -90 mv obtained during voltage ramp from -100 to 100 mv (1 second duration) from a V<sub>h</sub> of 0 mV repeated every 5 s. **B)** Representative current ramps taken at the times indicated in the relative time course shown in A.

**A**

CTRL

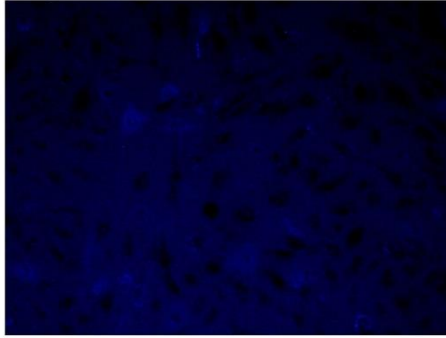Ag<sup>+</sup>10 μM (free calcium)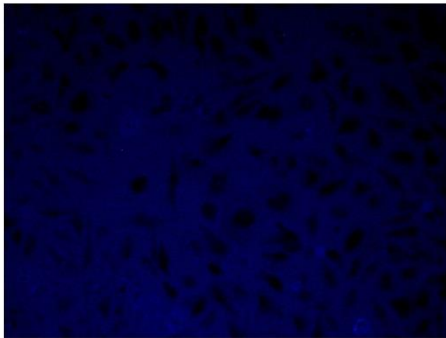Ag<sup>+</sup>10 μM (2 mM calcium)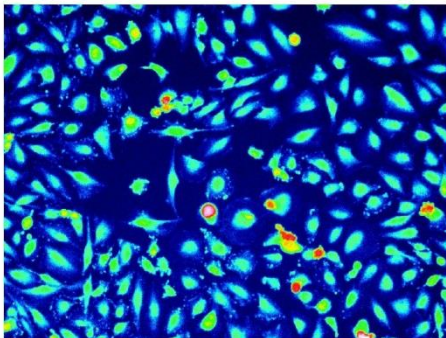**B**

Cysteine 20 μM

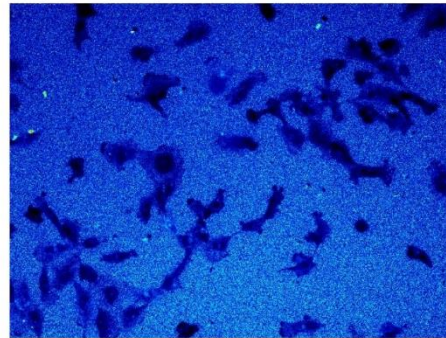Ag<sup>+</sup>10 μM (cysteine)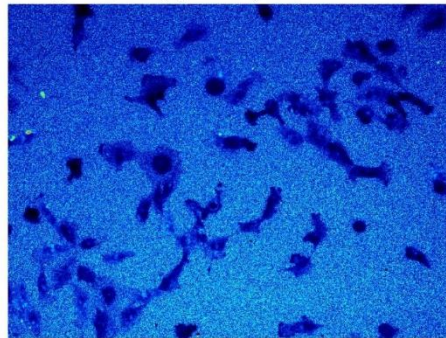Ag<sup>+</sup>10 μM (free cysteine)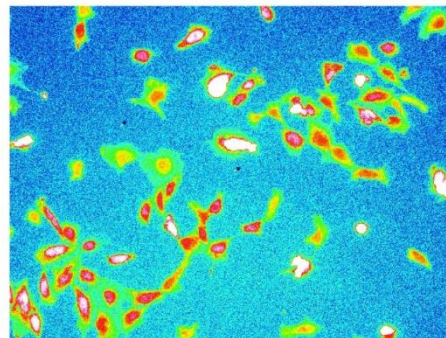

**Supplementary Fig. S3. Representative pseudo-colours calcium imaging of experimental data from fig. 2.** A) and B) Pseudo-colours calcium imaging captures at the time indicating in Fig 2A and 2B respectively. Intracellular calcium levels is indicated on a rainbow scale with blue represent low  $[Ca^{2+}]_i$  and orange/red high  $[Ca^{2+}]_i$ .

before tripan blue staining

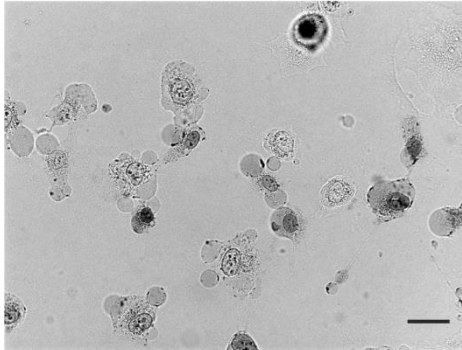

after 5 minutes of tripan blue staining

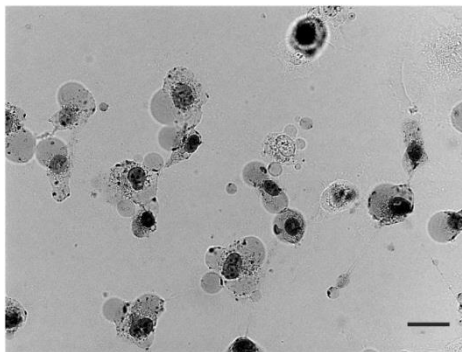

**Supplementary Fig. S4. Tripan blue assay in Ag<sup>+</sup> -induced blebbing cells.** Images of U251 exposed for 30 min to 3  $\mu$ M of silver ions before and after 5 min of 10% v/v of tripan blue staining. Scaling bars: 20  $\mu$ m.

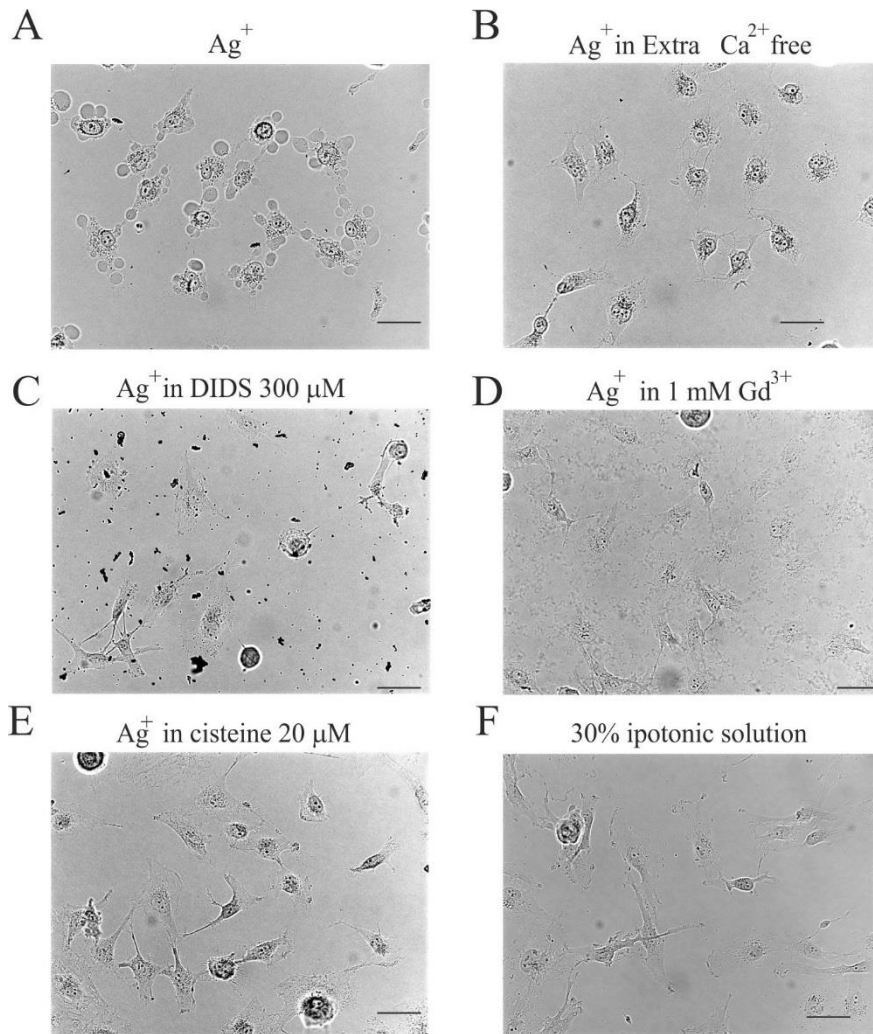

**Supplementary Fig. S5. Blockers of IAg abolished silver ions induced morphological changes in U251 cells.** A) Blebs formation after 30 minutes of 3  $\mu\text{M}$  silver ions treatment in U251 cells. Blebs formation is abolished when Silver ions is applied in  $\text{Ca}^{2+}$ -free medium (B) and when silver ions was co-applied with 300  $\mu\text{M}$  DIDS (C), 1 mM  $\text{Gd}^{3+}$  (D) or 20  $\mu\text{M}$  cysteine (E). Ipotonic conditions do not allow blebs formation, although swelling was detect (F). Scaling bars: 20  $\mu\text{m}$ .
